# Supplementary material for: Exfoliation of triazole-based C3N4.8, C3N6, and C3N7 nanosheets for efficient photocatalytic ammonia production
Source: Royal Society of Chemistry journal article supplement (doi:10.1039/d4nr03639e), 2024-12-18
Supplement: d4nr03639e1.pdf [file d4nr03639e1.pdf]

## Supplementary Information

### Exfoliation of triazole-based $C_3N_{4,8}$ , $C_3N_6$ , and $C_3N_7$ nanosheets for efficient photocatalytic ammonia production

Ayoung Yoon,<sup>a†</sup> Taehoon Kim,<sup>b†</sup> Dokyung Kim,<sup>c</sup> Young Joo Lee,<sup>c,d</sup> Seong-Ju Hwang,<sup>b\*</sup> and In Young Kim<sup>a\*</sup>

<sup>a</sup>Department of Chemistry and Nanoscience, College of Natural Sciences, Ewha Womans University, Seoul 03760, Republic of Korea

<sup>b</sup>Department of Materials Science and Engineering, College of Engineering, Yonsei University, Seoul 03722, Republic of Korea

<sup>c</sup>Metropolitan Seoul Center, Korea Basic Science Institute, Seoul 03759, Republic of Korea

<sup>d</sup>Department of Chemistry, Chung-Ang University, Seoul 06974, Republic of Korea

† These authors equally contributed to this work.

\*Corresponding author

E-mail: hwangsju@yonsei.ac.kr (S.-J.H.)

E-mail: iykim@ewha.ac.kr (I.Y.K.)

## Experimental

*Exfoliation of  $C_3N_{4.8}$ ,  $C_3N_6$ , and  $C_3N_7$ :* Bulk  $C_3N_{4.8}$ ,  $C_3N_6$ , and  $C_3N_7$  were synthesized by calcination of 5-amino-1H-tetrazole of 3.00 g at elevated temperature for 4 h under Ar gas flowing. The calcination temperatures were 400, 300, and 250 °C for synthesizing  $C_3N_{4.8}$ ,  $C_3N_6$ , and  $C_3N_7$ , respectively. Each sample of 0.3 g was sonicated in isopropyl alcohol (>99.5%) of 100 mL at 180 W for 3 h in a bath sonicator (Sungdong ultrasound, SD-D300H). The resulting solution was centrifuged at 3,000 rpm for 3 min to remove unexfoliated carbon nitrides. Supernatant solution was obtained as a colloidal solution of exfoliated carbon nitrides. To solidify exfoliated carbon nitrides nanosheets, the colloidal solution was centrifuged at 14,000 rpm for 30 min, followed by drying at room temperature and vacuum conditions. Bulk g- $C_3N_4$  was synthesized by calcination of dicyandiamide of 3.00 g at 600 °C for 4 h under Ar gas flowing. Its exfoliation was achieved through same procedures to obtain g- $C_3N_4$  nanosheets as a reference material.

*Characterization:* The crystal structures of bulk and exfoliated samples were examined using a powder X-ray diffractometer (XRD; Rigaku, D/MAX-2200/VPC) with Cu  $K_\alpha$  ( $\lambda = 1.5418 \text{ \AA}$ ) radiation produced at 40 kV and 30 mA. Solid-state nuclear magnetic resonance (NMR) experiments were performed on a Bruker Avance III 400 spectrometer equipped with 4 mm double resonance magic angle spinning (MAS) probe (WS004 at KBSI Metropolitan Seoul Center).  $^{13}\text{C}$  MAS NMR spectra were acquired at a  $^{13}\text{C}$  operating frequency of 100.65 MHz with high-power proton decoupling, spinning frequency of 10 kHz and recycle delay of 10 s.  $^{13}\text{C}$  MAS NMR spectrum of empty rotor was also collected using the same conditions with the samples for background subtraction. The crystal morphology of exfoliated samples was inspected by a high-resolution transmission electron microscope (HR-TEM; Jeol, JEM-2100F) at 200 kV. The thickness of the exfoliated samples was confirmed with an atomic force microscopy (AFM; Bruker, Dimension Edge AFM) in a tapping mode. X-ray photoelectron

spectroscopy (XPS) and ultraviolet photoelectron spectroscopy (UPS) were performed through the NEXSA (Thermo Fisher Scientific), equipped with an Al  $K_{\alpha}$  X-rays (1486.7eV) radiation source at GIST Advanced Institute of Instrumental Analysis (GAIA). The near-edge X-ray absorption fine structure (NEXAFS) measurements of exfoliated samples were conducted at the 10A2 HRPES II beamline of Pohang Accelerator Laboratory (Pohang, Republic of Korea). The drop-cast films of exfoliated carbon nitride nanosheets were used for the NEXAFS and XPS analyses. The bandgaps of bulk and exfoliated samples were confirmed in diffuse reflectance mode by UV–Vis spectrophotometer (Shimadzu, UV-3600i Plus). The Zeta potential of the exfoliated samples was confirmed by a Zeta potential analyzer (Otsuka Electronics, ELS-2000ZS). Photoluminescence (PL) spectra of the exfoliated samples were measured under excitation wavelength of 320 nm by a PL spectrometer (Jasco, FP-8500). The XRD, TEM, AFM, UV–Vis spectrophotometer, Zeta potential analyzer and PL spectrometer were available at the National Research Facilities and Equipment Center (NanoBio·Energy Materials Center) at Ewha Womans University.

*Photocatalysis for NRR:* The photocatalytic performances of carbon nitrides toward  $N_2$  reduction reaction (NRR) were evaluated in a quartz reactor under atmospheric pressure and room temperature. 30 mg of photocatalyst was suspended in 100 mL of distilled water/methanol (9/1 vol%) and the mixture was continuously stirred to achieve uniform dispersion. The reactor was sealed and purged with purified  $N_2$ -feed gas at a flowrate of 50 mL  $min^{-1}$  for 30 min in dark to establish adsorption–desorption balance and saturate the solution. Then, irradiation was performed using a 300 W Xe lamp with a  $\lambda > 420$  nm cut-off filter, and  $N_2$  was bubbled with a rate of 50 mL  $min^{-1}$  through the solution. 1 mL of suspension was withdrawn at every 30 min intervals and passed through a 0.2  $\mu m$  PTFE syringe filter to

remove solid catalysts. The concentration of ammonia was analyzed using the Nessler's reagent spectrophotometry method.<sup>1</sup>

**Fig. S1** X-ray diffraction (XRD) patterns of bulk  $g\text{-C}_3\text{N}_4$ ,  $\text{C}_3\text{N}_{4.8}$ ,  $\text{C}_3\text{N}_6$ , and  $\text{C}_3\text{N}_7$  in  $2\theta$  ranges of (left)  $5^\circ\text{--}60^\circ$  and (right)  $25^\circ\text{--}30^\circ$ .

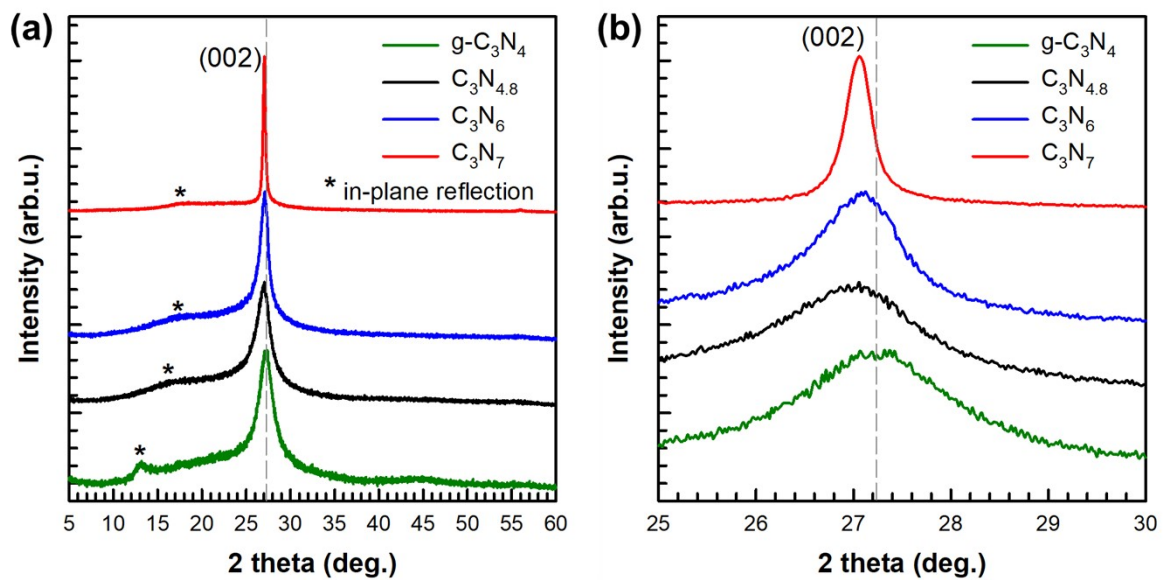

**Table S1** Zeta potential of exfoliated g-C<sub>3</sub>N<sub>4</sub>, C<sub>3</sub>N<sub>4.8</sub>, C<sub>3</sub>N<sub>6</sub>, and C<sub>3</sub>N<sub>7</sub> nanosheets.

|                       | <b>g-C<sub>3</sub>N<sub>4</sub></b> | <b>C<sub>3</sub>N<sub>5</sub></b> | <b>C<sub>3</sub>N<sub>6</sub></b> | <b>C<sub>3</sub>N<sub>7</sub></b> |
|-----------------------|-------------------------------------|-----------------------------------|-----------------------------------|-----------------------------------|
| <b>Zeta potential</b> | -48.7 mV                            | -60.6 mV                          | -53.6 mV                          | -55.1 mV                          |

**Fig. S2** N<sub>2</sub> adsorption isotherms of (left) bulk and (right) exfoliated g-C<sub>3</sub>N<sub>4</sub>, C<sub>3</sub>N<sub>4.8</sub>, C<sub>3</sub>N<sub>6</sub>, and C<sub>3</sub>N<sub>7</sub> nanosheets measured at 77 K

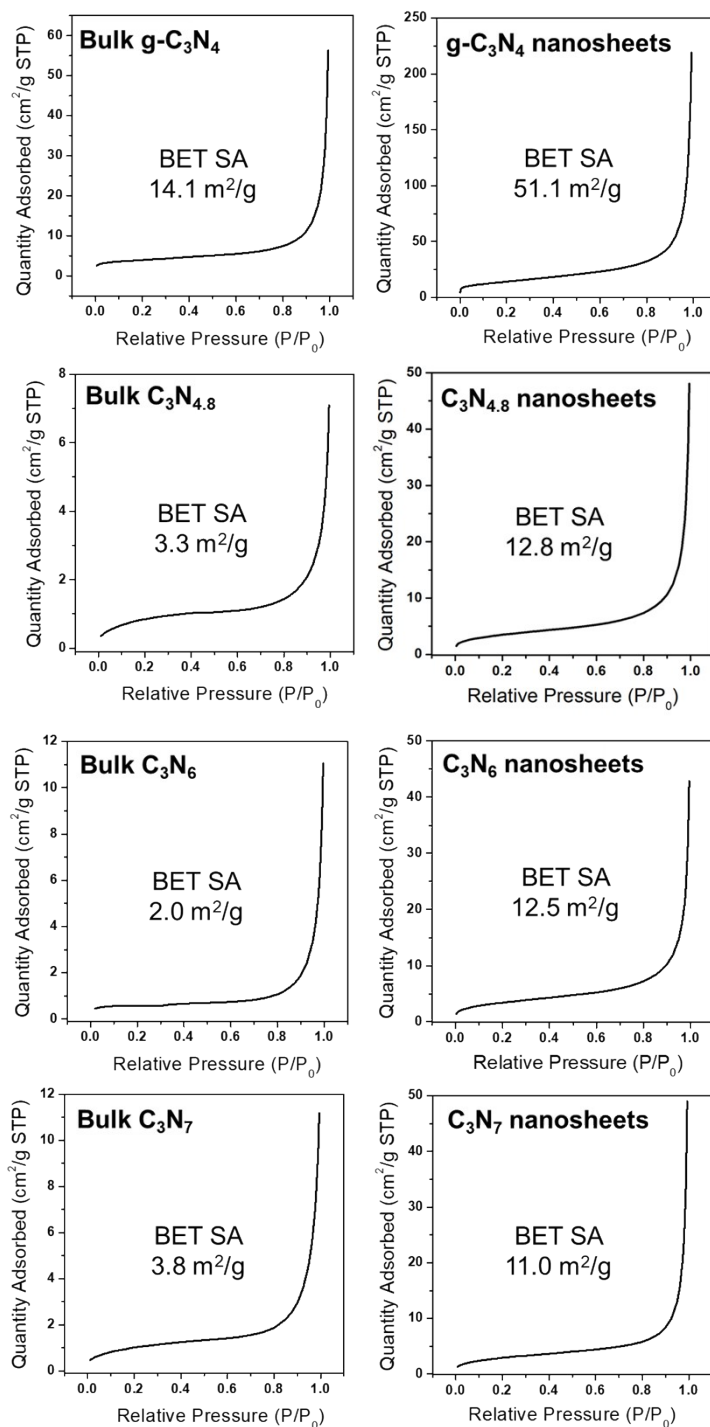

**Fig. S3** High resolution C 1s X-ray photoelectron spectroscopy (XPS) data of exfoliated (a) g- $C_3N_4$ , (b)  $C_3N_{4.8}$ , (c)  $C_3N_6$ , and (d)  $C_3N_7$  nanosheets.

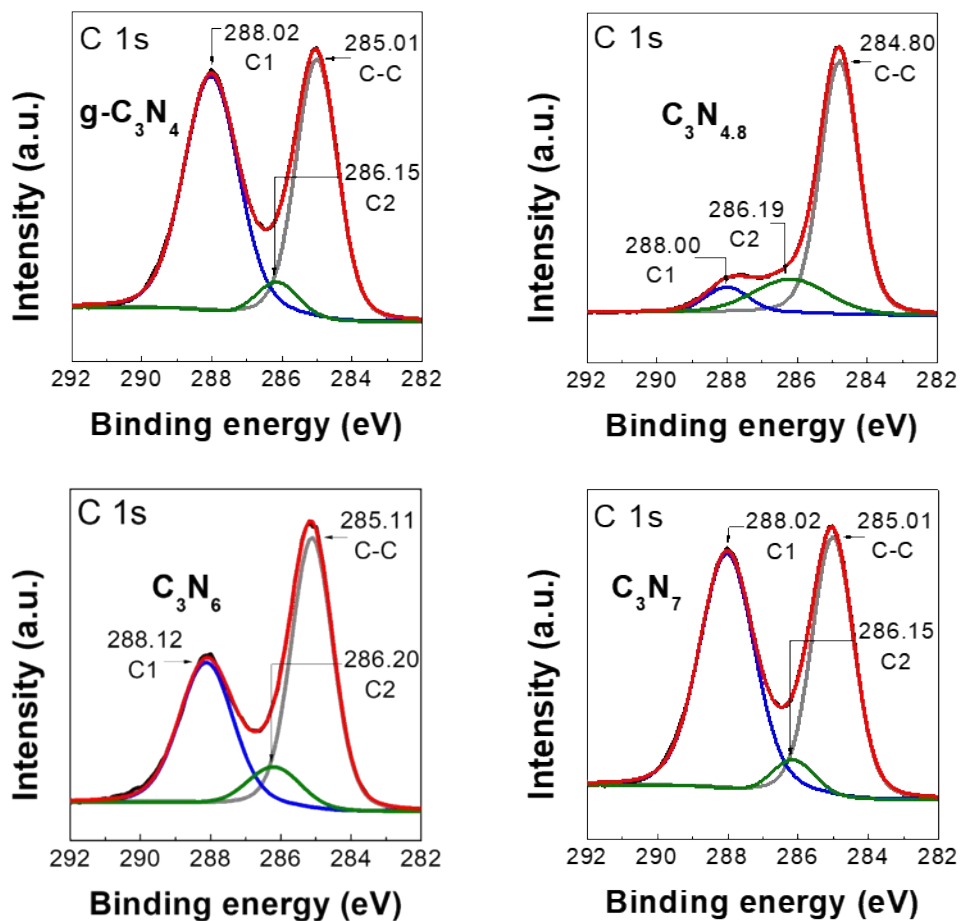



**Fig. S4** High resolution N 1s XPS data of bulk (a)  $g\text{-C}_3\text{N}_4$ , (b)  $\text{C}_3\text{N}_{4.8}$ , (c)  $\text{C}_3\text{N}_6$ , and (d)  $\text{C}_3\text{N}_7$  nanosheets.

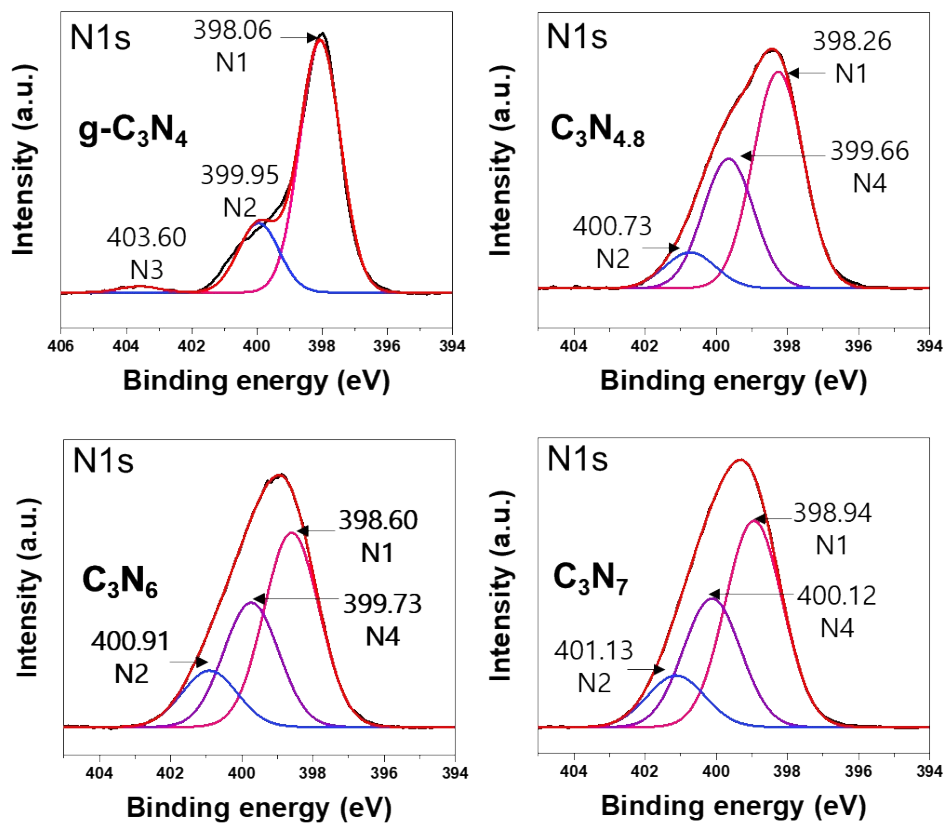

**Fig. S5** TEM images of 30 days-aged  $g\text{-C}_3\text{N}_4$ ,  $\text{C}_3\text{N}_{4.8}$ ,  $\text{C}_3\text{N}_6$ , and  $\text{C}_3\text{N}_7$  nanosheets.

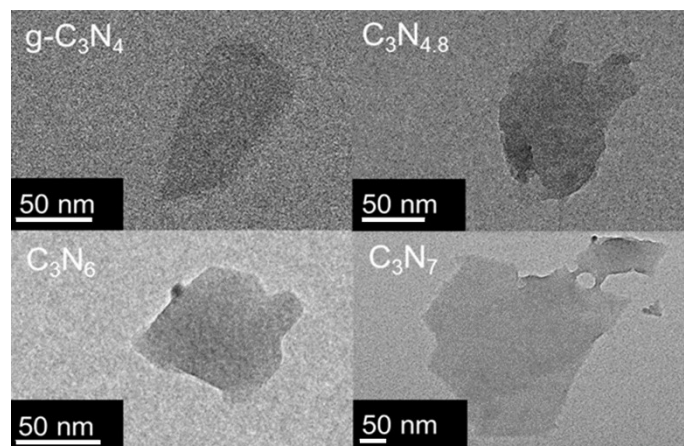

**Fig. S6** Amounts of ammonia generated on bulk  $g\text{-C}_3\text{N}_4$ ,  $\text{C}_3\text{N}_{4.8}$ ,  $\text{C}_3\text{N}_6$  and  $\text{C}_3\text{N}_7$  under  $\text{N}_2$  atmosphere.

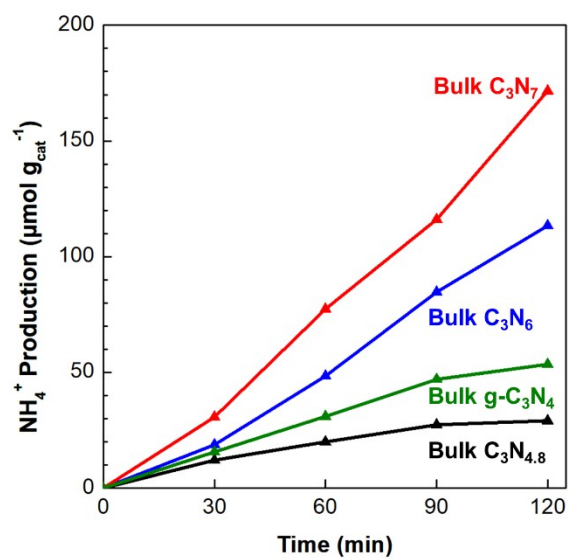

Bulk  $g\text{-C}_3\text{N}_4$ ,  $\text{C}_3\text{N}_{4.8}$ ,  $\text{C}_3\text{N}_6$  and  $\text{C}_3\text{N}_7$  generates ammonia with rates of 27.7, 14.7, 58.5, and 85.7  $\mu\text{mol g}_{\text{cat}}^{-1} \text{h}^{-1}$ , respectively.

**Fig. S7** Comparison of amounts of ammonia generated on exfoliated  $C_3N_7$  nanosheets under  $N_2$  and Ar atmospheres

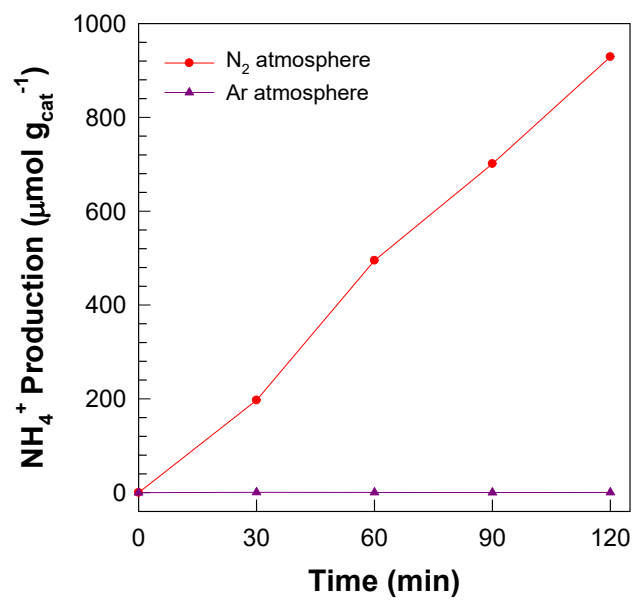

**Fig. S8.** Amounts of ammonia generated on exfoliated  $C_3N_7$  nanosheets under  $N_2$  atmosphere for consecutive 5 cycles.

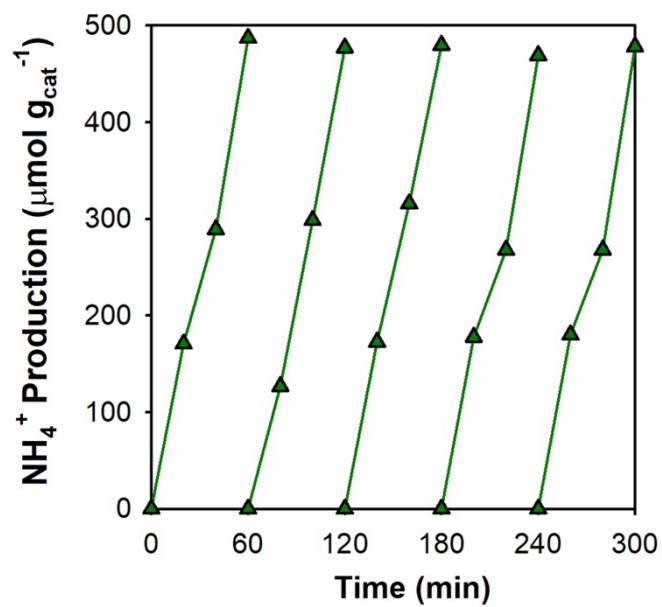

## Reference

1. X. He, H. Liu, J. Qin, Z. Niu, J. Mu, B. Liu, *Dalton Trans.* 2023, **52**, 10869.
